# Supplementary material
Source: Springer Nature journal article supplement (https://www.springermedizin.de/resource/supplementary/13256_2011_1707_MOESM6_ESM.pdf/9648290)

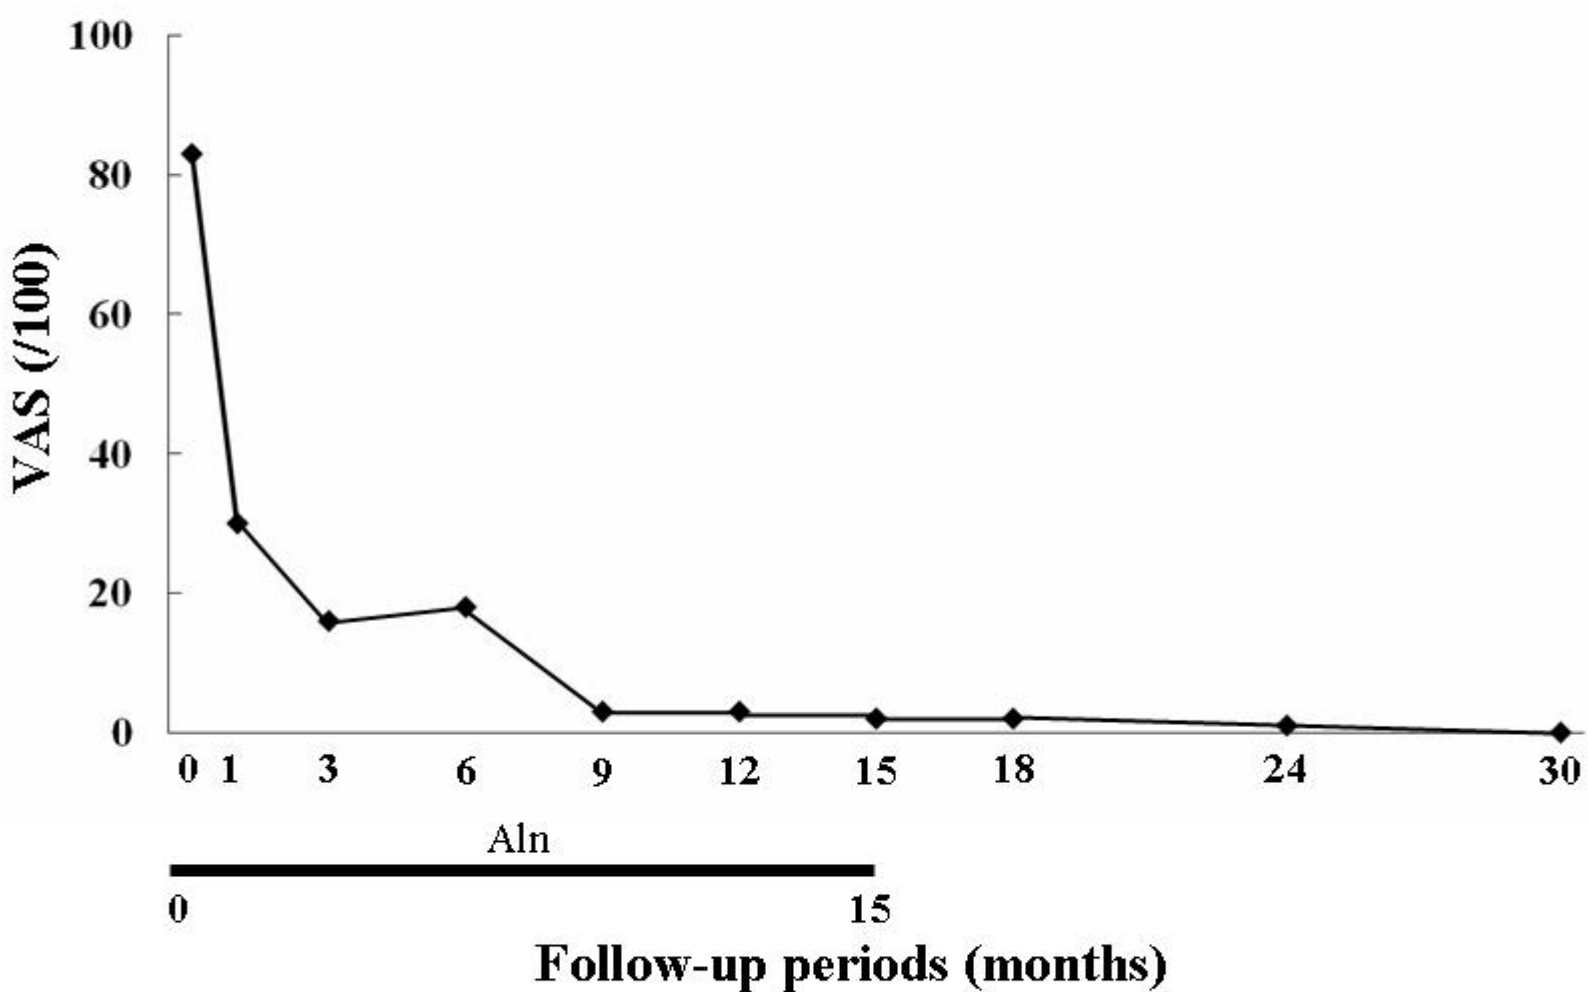

Supplement: MOESM6 [file 9648290]
